# Supplementary material
Source: PubMed Central journal article supplement (PMC3105437)
Supplement: supp_kwq401_kwq401_Web_Table_1.pdf [file supp_kwq401_kwq401_Web_Table_1.pdf]

**Web Table 1.** List of top 200 SNPs used in the smaller sets of AIMS

| SNP_ID     | Chromosome | Position  | West African variant allele count | West African reference allele count | European American variant allele count | European American reference allele count | West African variant allele frequency | European American variant allele frequency | Delta | BWHS variant allele frequency |
|------------|------------|-----------|-----------------------------------|-------------------------------------|----------------------------------------|------------------------------------------|---------------------------------------|--------------------------------------------|-------|-------------------------------|
| rs2814778  | 1          | 155987756 | 0                                 | 314                                 | 523                                    | 1                                        | 0.000                                 | 0.998                                      | 0.998 | 0.209                         |
| rs2675345  | 15         | 46187491  | 115                               | 3                                   | 0                                      | 160                                      | 0.975                                 | 0.000                                      | 0.975 | 0.778                         |
| rs12012275 | 23         | 147649275 | 207                               | 5                                   | 2                                      | 268                                      | 0.976                                 | 0.007                                      | 0.969 | 0.793                         |
| rs5962536  | 23         | 104530634 | 117                               | 3                                   | 2                                      | 118                                      | 0.975                                 | 0.017                                      | 0.958 | 0.821                         |
| rs344454   | 7          | 145839082 | 0                                 | 202                                 | 385                                    | 17                                       | 0.000                                 | 0.958                                      | 0.958 | 0.221                         |
| rs1414370  | 23         | 63232776  | 13                                | 295                                 | 536                                    | 4                                        | 0.042                                 | 0.993                                      | 0.950 | 0.183                         |
| rs3814134  | 9          | 124347243 | 116                               | 4                                   | 2                                      | 118                                      | 0.967                                 | 0.017                                      | 0.950 | 0.728                         |
| rs35397    | 5          | 33986873  | 6                                 | 176                                 | 259                                    | 5                                        | 0.033                                 | 0.981                                      | 0.948 | 0.222                         |
| rs7919137  | 10         | 31665395  | 198                               | 2                                   | 24                                     | 372                                      | 0.990                                 | 0.061                                      | 0.929 | 0.793                         |
| rs199138   | 15         | 43174842  | 4                                 | 174                                 | 249                                    | 13                                       | 0.022                                 | 0.950                                      | 0.928 | 0.233                         |
| rs11840893 | 13         | 104180092 | 170                               | 8                                   | 8                                      | 256                                      | 0.955                                 | 0.030                                      | 0.925 | 0.740                         |
| rs1811510  | 3          | 5750231   | 173                               | 9                                   | 7                                      | 257                                      | 0.951                                 | 0.027                                      | 0.924 | 0.771                         |
| rs7006934  | 8          | 54812636  | 199                               | 3                                   | 26                                     | 372                                      | 0.985                                 | 0.065                                      | 0.920 | 0.796                         |
| rs6793627  | 3          | 190527001 | 173                               | 9                                   | 8                                      | 250                                      | 0.951                                 | 0.031                                      | 0.920 | 0.757                         |
| rs2336656  | 23         | 35851166  | 114                               | 4                                   | 8                                      | 152                                      | 0.966                                 | 0.050                                      | 0.916 | 0.824                         |
| rs2823880  | 21         | 16850425  | 185                               | 17                                  | 0                                      | 400                                      | 0.916                                 | 0.000                                      | 0.916 | 0.710                         |
| rs6587361  | 1          | 226325783 | 10                                | 108                                 | 160                                    | 0                                        | 0.085                                 | 1.000                                      | 0.915 | 0.299                         |
| rs802566   | 7          | 145393531 | 10                                | 192                                 | 386                                    | 16                                       | 0.050                                 | 0.960                                      | 0.911 | 0.256                         |
| rs7103088  | 11         | 129514516 | 5                                 | 177                                 | 242                                    | 16                                       | 0.027                                 | 0.938                                      | 0.911 | 0.220                         |
| rs4891384  | 18         | 65775534  | 7                                 | 111                                 | 154                                    | 6                                        | 0.059                                 | 0.963                                      | 0.903 | 0.258                         |
| rs16932430 | 9          | 334332    | 183                               | 19                                  | 2                                      | 398                                      | 0.906                                 | 0.005                                      | 0.901 | 0.749                         |
| rs480616   | 15         | 32057267  | 17                                | 183                                 | 396                                    | 6                                        | 0.085                                 | 0.985                                      | 0.900 | 0.291                         |
| rs10313    | 5          | 180615011 | 9                                 | 169                                 | 249                                    | 13                                       | 0.051                                 | 0.950                                      | 0.900 | 0.225                         |
| rs9784387  | 3          | 98410453  | 165                               | 15                                  | 5                                      | 259                                      | 0.917                                 | 0.019                                      | 0.898 | 0.707                         |
| rs10041728 | 5          | 121164880 | 2                                 | 116                                 | 146                                    | 14                                       | 0.017                                 | 0.913                                      | 0.896 | 0.213                         |
| rs1480642  | 6          | 136541221 | 283                               | 31                                  | 4                                      | 538                                      | 0.901                                 | 0.007                                      | 0.894 | 0.704                         |
| rs1448484  | 15         | 25957036  | 162                               | 20                                  | 0                                      | 264                                      | 0.890                                 | 0.000                                      | 0.890 | 0.683                         |
| rs4790359  | 17         | 2578735   | 21                                | 177                                 | 400                                    | 2                                        | 0.106                                 | 0.995                                      | 0.889 | 0.275                         |
| rs6491743  | 13         | 102859333 | 8                                 | 194                                 | 373                                    | 29                                       | 0.040                                 | 0.928                                      | 0.888 | 0.240                         |
| rs719776   | 4          | 33509226  | 195                               | 5                                   | 35                                     | 357                                      | 0.975                                 | 0.089                                      | 0.886 | 0.800                         |
| rs10954631 | 7          | 137996881 | 16                                | 166                                 | 251                                    | 7                                        | 0.088                                 | 0.973                                      | 0.885 | 0.271                         |
| rs7889874  | 23         | 20193158  | 8                                 | 174                                 | 245                                    | 19                                       | 0.044                                 | 0.928                                      | 0.884 | 0.203                         |
| rs10833134 | 11         | 19584103  | 186                               | 16                                  | 16                                     | 386                                      | 0.921                                 | 0.040                                      | 0.881 | 0.726                         |
| rs16866714 | 2          | 226502639 | 21                                | 181                                 | 392                                    | 6                                        | 0.104                                 | 0.985                                      | 0.881 | 0.306                         |
| rs1881244  | 2          | 73556744  | 20                                | 194                                 | 261                                    | 7                                        | 0.093                                 | 0.974                                      | 0.880 | 0.295                         |
| rs6528455  | 23         | 136165726 | 10                                | 108                                 | 154                                    | 6                                        | 0.085                                 | 0.963                                      | 0.878 | 0.238                         |
| rs12058538 | 1          | 35154678  | 158                               | 16                                  | 8                                      | 254                                      | 0.908                                 | 0.031                                      | 0.878 | 0.663                         |
| rs9306764  | 23         | 21902011  | 166                               | 14                                  | 12                                     | 252                                      | 0.922                                 | 0.045                                      | 0.877 | 0.774                         |
| rs10841722 | 12         | 21057358  | 15                                | 167                                 | 253                                    | 11                                       | 0.082                                 | 0.958                                      | 0.876 | 0.297                         |

|            |    |           |     |     |     |     |       |       |       |       |
|------------|----|-----------|-----|-----|-----|-----|-------|-------|-------|-------|
| rs2719890  | 15 | 23070055  | 31  | 283 | 265 | 7   | 0.099 | 0.974 | 0.876 | 0.287 |
| rs1110471  | 16 | 64908094  | 118 | 2   | 13  | 107 | 0.983 | 0.108 | 0.875 | 0.788 |
| rs7063160  | 23 | 67583909  | 179 | 3   | 28  | 228 | 0.984 | 0.109 | 0.874 | 0.835 |
| rs2045520  | 1  | 230610704 | 7   | 175 | 239 | 23  | 0.038 | 0.912 | 0.874 | 0.221 |
| rs2416309  | 5  | 112600473 | 176 | 6   | 25  | 239 | 0.967 | 0.095 | 0.872 | 0.776 |
| rs2731232  | 12 | 89076579  | 6   | 192 | 240 | 26  | 0.030 | 0.902 | 0.872 | 0.203 |
| rs7689609  | 4  | 72448409  | 202 | 0   | 51  | 347 | 1.000 | 0.128 | 0.872 | 0.820 |
| rs1012023  | 14 | 33025960  | 21  | 181 | 392 | 10  | 0.104 | 0.975 | 0.871 | 0.281 |
| rs10778691 | 12 | 78722356  | 4   | 198 | 347 | 43  | 0.020 | 0.890 | 0.870 | 0.214 |
| rs17520733 | 7  | 70094440  | 198 | 4   | 44  | 354 | 0.980 | 0.111 | 0.870 | 0.804 |
| rs4516239  | 16 | 77004103  | 162 | 16  | 11  | 253 | 0.910 | 0.042 | 0.868 | 0.667 |
| rs8079412  | 17 | 26301240  | 37  | 271 | 407 | 5   | 0.120 | 0.988 | 0.868 | 0.313 |
| rs171259   | 23 | 127191935 | 4   | 178 | 233 | 29  | 0.022 | 0.889 | 0.867 | 0.145 |
| rs1780838  | 23 | 45320574  | 173 | 9   | 22  | 242 | 0.951 | 0.083 | 0.867 | 0.848 |
| rs1254401  | 3  | 124836431 | 13  | 167 | 244 | 16  | 0.072 | 0.938 | 0.866 | 0.246 |
| rs13439780 | 8  | 56506740  | 13  | 105 | 156 | 4   | 0.110 | 0.975 | 0.865 | 0.364 |
| rs2156103  | 18 | 68626876  | 173 | 25  | 4   | 396 | 0.874 | 0.010 | 0.864 | 0.676 |
| rs5948775  | 23 | 6338291   | 9   | 173 | 241 | 23  | 0.049 | 0.913 | 0.863 | 0.215 |
| rs3763547  | 8  | 52974896  | 11  | 171 | 242 | 20  | 0.060 | 0.924 | 0.863 | 0.247 |
| rs10786930 | 10 | 108001243 | 166 | 16  | 13  | 251 | 0.912 | 0.049 | 0.863 | 0.739 |
| rs9290364  | 3  | 170477884 | 285 | 27  | 21  | 393 | 0.913 | 0.051 | 0.863 | 0.734 |
| rs6556222  | 5  | 175110027 | 15  | 163 | 248 | 14  | 0.084 | 0.947 | 0.862 | 0.289 |
| rs3808907  | 10 | 25282928  | 23  | 159 | 261 | 3   | 0.126 | 0.989 | 0.862 | 0.308 |
| rs11115459 | 12 | 81746582  | 15  | 167 | 238 | 14  | 0.082 | 0.944 | 0.862 | 0.290 |
| rs9725312  | 1  | 241364859 | 16  | 162 | 251 | 13  | 0.090 | 0.951 | 0.861 | 0.329 |
| rs2923419  | 8  | 42585573  | 170 | 12  | 19  | 239 | 0.934 | 0.074 | 0.860 | 0.740 |
| rs981197   | 9  | 73634385  | 21  | 177 | 388 | 14  | 0.106 | 0.965 | 0.859 | 0.277 |
| rs527709   | 11 | 105756724 | 5   | 175 | 234 | 30  | 0.028 | 0.886 | 0.859 | 0.209 |
| rs6733255  | 2  | 127378616 | 18  | 156 | 252 | 10  | 0.103 | 0.962 | 0.858 | 0.293 |
| rs5956063  | 23 | 117384262 | 116 | 4   | 13  | 107 | 0.967 | 0.108 | 0.858 | 0.730 |
| rs310644   | 20 | 61629948  | 10  | 164 | 238 | 22  | 0.057 | 0.915 | 0.858 | 0.230 |
| rs2301550  | 9  | 20344796  | 277 | 37  | 13  | 511 | 0.882 | 0.025 | 0.857 | 0.702 |
| rs7876845  | 23 | 36197205  | 13  | 185 | 367 | 31  | 0.066 | 0.922 | 0.856 | 0.318 |
| rs7692206  | 4  | 155464298 | 9   | 173 | 237 | 25  | 0.049 | 0.905 | 0.855 | 0.241 |
| rs12262718 | 10 | 17383712  | 11  | 169 | 240 | 22  | 0.061 | 0.916 | 0.855 | 0.250 |
| rs7214631  | 17 | 55947947  | 174 | 28  | 3   | 399 | 0.861 | 0.007 | 0.854 | 0.703 |
| rs700853   | 2  | 107812646 | 160 | 18  | 11  | 225 | 0.899 | 0.047 | 0.852 | 0.717 |
| rs2249070  | 7  | 138329600 | 18  | 162 | 251 | 13  | 0.100 | 0.951 | 0.851 | 0.295 |
| rs2759281  | 1  | 201598022 | 3   | 179 | 222 | 34  | 0.016 | 0.867 | 0.851 | 0.186 |
| rs798006   | 1  | 117057230 | 195 | 23  | 12  | 262 | 0.894 | 0.044 | 0.851 | 0.672 |
| rs7978988  | 12 | 34288146  | 40  | 262 | 401 | 7   | 0.132 | 0.983 | 0.850 | 0.340 |
| rs7054363  | 23 | 37645852  | 16  | 164 | 246 | 16  | 0.089 | 0.939 | 0.850 | 0.258 |
| rs992864   | 23 | 110306728 | 23  | 287 | 495 | 41  | 0.074 | 0.924 | 0.849 | 0.207 |
| rs2905495  | 11 | 60597857  | 184 | 16  | 28  | 368 | 0.920 | 0.071 | 0.849 | 0.760 |
| rs7934726  | 11 | 113415486 | 175 | 27  | 7   | 395 | 0.866 | 0.017 | 0.849 | 0.673 |
| rs1020903  | 23 | 98959539  | 25  | 271 | 487 | 35  | 0.084 | 0.933 | 0.848 | 0.186 |
| rs1523643  | 8  | 16833606  | 169 | 13  | 21  | 241 | 0.929 | 0.080 | 0.848 | 0.751 |
| rs17054173 | 9  | 88349153  | 200 | 2   | 56  | 338 | 0.990 | 0.142 | 0.848 | 0.808 |
| rs835574   | 1  | 120175272 | 179 | 3   | 35  | 223 | 0.984 | 0.136 | 0.848 | 0.788 |
| rs9925564  | 16 | 9136557   | 157 | 25  | 4   | 260 | 0.863 | 0.015 | 0.847 | 0.677 |
| rs3025991  | 2  | 74811462  | 3   | 179 | 228 | 36  | 0.016 | 0.864 | 0.847 | 0.215 |
| rs1408784  | 23 | 68409905  | 170 | 12  | 23  | 241 | 0.934 | 0.087 | 0.847 | 0.799 |

|            |    |           |     |     |     |     |       |       |       |       |
|------------|----|-----------|-----|-----|-----|-----|-------|-------|-------|-------|
| rs4881055  | 10 | 3043366   | 170 | 10  | 26  | 236 | 0.944 | 0.099 | 0.845 | 0.756 |
| rs7235479  | 18 | 2453095   | 24  | 158 | 250 | 6   | 0.132 | 0.977 | 0.845 | 0.303 |
| rs313617   | 5  | 109845448 | 173 | 9   | 28  | 236 | 0.951 | 0.106 | 0.844 | 0.766 |
| rs4694666  | 4  | 75432877  | 19  | 159 | 251 | 13  | 0.107 | 0.951 | 0.844 | 0.285 |
| rs6601548  | 8  | 10925506  | 9   | 171 | 236 | 28  | 0.050 | 0.894 | 0.844 | 0.278 |
| rs12489482 | 3  | 106062098 | 13  | 167 | 240 | 22  | 0.072 | 0.916 | 0.844 | 0.310 |
| rs6456591  | 6  | 10751821  | 109 | 9   | 13  | 147 | 0.924 | 0.081 | 0.842 | 0.765 |
| rs7402101  | 15 | 69841884  | 155 | 25  | 5   | 259 | 0.861 | 0.019 | 0.842 | 0.719 |
| rs7810554  | 7  | 14914430  | 1   | 181 | 222 | 40  | 0.005 | 0.847 | 0.842 | 0.177 |
| rs3087652  | 15 | 70422957  | 103 | 15  | 5   | 155 | 0.873 | 0.031 | 0.842 | 0.691 |
| rs974828   | 15 | 58642847  | 293 | 17  | 56  | 484 | 0.945 | 0.104 | 0.841 | 0.765 |
| rs6604611  | 1  | 213043646 | 19  | 157 | 243 | 13  | 0.108 | 0.949 | 0.841 | 0.312 |
| rs2623382  | 3  | 100550148 | 174 | 8   | 30  | 230 | 0.956 | 0.115 | 0.841 | 0.792 |
| rs6510761  | 19 | 3516909   | 191 | 11  | 42  | 358 | 0.946 | 0.105 | 0.841 | 0.729 |
| rs7201030  | 16 | 75081293  | 12  | 302 | 476 | 66  | 0.038 | 0.878 | 0.840 | 0.208 |
| rs10256829 | 7  | 103276634 | 17  | 163 | 241 | 17  | 0.094 | 0.934 | 0.840 | 0.285 |
| rs857455   | 6  | 14788086  | 27  | 175 | 389 | 11  | 0.134 | 0.973 | 0.839 | 0.360 |
| rs4977826  | 9  | 23117562  | 164 | 16  | 19  | 243 | 0.911 | 0.073 | 0.839 | 0.737 |
| rs7662047  | 4  | 103448908 | 28  | 154 | 260 | 2   | 0.154 | 0.992 | 0.839 | 0.363 |
| rs9388989  | 6  | 132739275 | 3   | 177 | 224 | 38  | 0.017 | 0.855 | 0.838 | 0.170 |
| rs744396   | 2  | 224396286 | 107 | 11  | 11  | 149 | 0.907 | 0.069 | 0.838 | 0.715 |
| rs1107704  | 17 | 70020020  | 194 | 8   | 49  | 351 | 0.960 | 0.123 | 0.838 | 0.785 |
| rs9288952  | 3  | 113667715 | 159 | 21  | 12  | 252 | 0.883 | 0.045 | 0.838 | 0.707 |
| rs10992623 | 9  | 92910203  | 180 | 2   | 40  | 224 | 0.989 | 0.152 | 0.837 | 0.808 |
| rs6558387  | 8  | 144910578 | 101 | 17  | 3   | 157 | 0.856 | 0.019 | 0.837 | 0.638 |
| rs230066   | 5  | 13576834  | 6   | 112 | 142 | 18  | 0.051 | 0.888 | 0.837 | 0.282 |
| rs10964101 | 9  | 1933156   | 11  | 169 | 237 | 27  | 0.061 | 0.898 | 0.837 | 0.250 |
| rs7657799  | 4  | 105733027 | 23  | 159 | 252 | 10  | 0.126 | 0.962 | 0.835 | 0.330 |
| rs7695466  | 4  | 52933205  | 29  | 151 | 263 | 1   | 0.161 | 0.996 | 0.835 | 0.377 |
| rs2631941  | 2  | 29892937  | 114 | 4   | 21  | 139 | 0.966 | 0.131 | 0.835 | 0.757 |
| rs5981317  | 23 | 74072365  | 289 | 23  | 49  | 485 | 0.926 | 0.092 | 0.835 | 0.818 |
| rs4705411  | 5  | 149411218 | 159 | 7   | 32  | 226 | 0.958 | 0.124 | 0.834 | 0.769 |
| rs554362   | 20 | 850002    | 161 | 31  | 2   | 400 | 0.839 | 0.005 | 0.834 | 0.696 |
| rs926228   | 23 | 132447904 | 18  | 276 | 483 | 57  | 0.061 | 0.894 | 0.833 | 0.183 |
| rs1545216  | 2  | 129811353 | 179 | 21  | 25  | 375 | 0.895 | 0.063 | 0.833 | 0.746 |
| rs7157792  | 14 | 76422856  | 169 | 31  | 5   | 385 | 0.845 | 0.013 | 0.832 | 0.639 |
| rs7138514  | 12 | 78297026  | 167 | 29  | 8   | 392 | 0.852 | 0.020 | 0.832 | 0.649 |
| rs4869577  | 5  | 38254937  | 20  | 160 | 247 | 15  | 0.111 | 0.943 | 0.832 | 0.280 |
| rs680273   | 11 | 64296211  | 290 | 24  | 38  | 372 | 0.924 | 0.093 | 0.831 | 0.767 |
| rs930072   | 5  | 36701828  | 19  | 295 | 244 | 30  | 0.061 | 0.891 | 0.830 | 0.211 |
| rs10793379 | 11 | 70408796  | 190 | 10  | 48  | 352 | 0.950 | 0.120 | 0.830 | 0.746 |
| rs9977149  | 21 | 15936071  | 11  | 171 | 235 | 29  | 0.060 | 0.890 | 0.830 | 0.212 |
| rs1712373  | 4  | 82512488  | 150 | 30  | 1   | 263 | 0.833 | 0.004 | 0.830 | 0.639 |
| rs10775349 | 16 | 4019824   | 14  | 162 | 240 | 24  | 0.080 | 0.909 | 0.830 | 0.302 |
| rs1450881  | 7  | 131289800 | 35  | 277 | 273 | 17  | 0.112 | 0.941 | 0.829 | 0.270 |
| rs4703161  | 5  | 100970354 | 27  | 175 | 385 | 15  | 0.134 | 0.963 | 0.829 | 0.280 |
| rs2938203  | 8  | 30250474  | 168 | 12  | 27  | 231 | 0.933 | 0.105 | 0.829 | 0.745 |
| rs17840659 | 8  | 111488705 | 182 | 20  | 29  | 371 | 0.901 | 0.073 | 0.828 | 0.745 |
| rs4532970  | 10 | 98623932  | 111 | 7   | 18  | 142 | 0.941 | 0.113 | 0.828 | 0.801 |
| rs6586395  | 1  | 230955554 | 160 | 20  | 16  | 246 | 0.889 | 0.061 | 0.828 | 0.701 |
| rs12159761 | 22 | 37597141  | 150 | 28  | 4   | 260 | 0.843 | 0.015 | 0.828 | 0.643 |
| rs4911320  | 20 | 31377692  | 152 | 26  | 7   | 257 | 0.854 | 0.027 | 0.827 | 0.711 |

|            |    |           |     |     |     |     |       |       |       |       |
|------------|----|-----------|-----|-----|-----|-----|-------|-------|-------|-------|
| rs1676038  | 2  | 164075818 | 161 | 21  | 15  | 247 | 0.885 | 0.057 | 0.827 | 0.656 |
| rs3823831  | 7  | 8013677   | 168 | 12  | 28  | 236 | 0.933 | 0.106 | 0.827 | 0.712 |
| rs311992   | 2  | 13442666  | 170 | 12  | 28  | 234 | 0.934 | 0.107 | 0.827 | 0.770 |
| rs4687591  | 3  | 53839447  | 183 | 15  | 39  | 361 | 0.924 | 0.098 | 0.827 | 0.735 |
| rs1037575  | 15 | 33527874  | 1   | 181 | 218 | 44  | 0.005 | 0.832 | 0.827 | 0.171 |
| rs9899687  | 17 | 70869854  | 113 | 5   | 21  | 139 | 0.958 | 0.131 | 0.826 | 0.798 |
| rs796829   | 10 | 29153703  | 17  | 185 | 366 | 36  | 0.084 | 0.910 | 0.826 | 0.263 |
| rs3849903  | 9  | 33308588  | 0   | 180 | 218 | 46  | 0.000 | 0.826 | 0.826 | 0.160 |
| rs7641230  | 3  | 145976480 | 11  | 107 | 147 | 13  | 0.093 | 0.919 | 0.826 | 0.250 |
| rs11136580 | 8  | 2970182   | 163 | 17  | 21  | 241 | 0.906 | 0.080 | 0.825 | 0.714 |
| rs7865808  | 9  | 2903620   | 43  | 269 | 522 | 20  | 0.138 | 0.963 | 0.825 | 0.295 |
| rs1031763  | 11 | 39886885  | 28  | 172 | 386 | 14  | 0.140 | 0.965 | 0.825 | 0.316 |
| rs3846193  | 3  | 190150867 | 263 | 49  | 10  | 534 | 0.843 | 0.018 | 0.825 | 0.694 |
| rs2155771  | 18 | 24818125  | 183 | 15  | 40  | 360 | 0.924 | 0.100 | 0.824 | 0.736 |
| rs12933048 | 16 | 5634379   | 27  | 175 | 385 | 17  | 0.134 | 0.958 | 0.824 | 0.322 |
| rs7557290  | 2  | 77424226  | 152 | 30  | 3   | 261 | 0.835 | 0.011 | 0.824 | 0.637 |
| rs1503949  | 16 | 22866185  | 15  | 163 | 236 | 24  | 0.084 | 0.908 | 0.823 | 0.282 |
| rs11064432 | 12 | 6839002   | 277 | 37  | 32  | 512 | 0.882 | 0.059 | 0.823 | 0.700 |
| rs9582807  | 13 | 103578174 | 179 | 23  | 25  | 373 | 0.886 | 0.063 | 0.823 | 0.740 |
| rs10925911 | 1  | 236034353 | 198 | 4   | 61  | 327 | 0.980 | 0.157 | 0.823 | 0.815 |
| rs11124405 | 2  | 35099662  | 158 | 24  | 12  | 252 | 0.868 | 0.045 | 0.823 | 0.680 |
| rs8042276  | 15 | 25367670  | 6   | 176 | 219 | 37  | 0.033 | 0.855 | 0.823 | 0.191 |
| rs1433391  | 7  | 131558772 | 39  | 275 | 515 | 29  | 0.124 | 0.947 | 0.822 | 0.275 |
| rs1163447  | 3  | 110539441 | 27  | 287 | 476 | 48  | 0.086 | 0.908 | 0.822 | 0.252 |
| rs6607358  | 17 | 32389367  | 170 | 30  | 11  | 385 | 0.850 | 0.028 | 0.822 | 0.663 |
| rs12897779 | 14 | 31254168  | 182 | 16  | 39  | 361 | 0.919 | 0.098 | 0.822 | 0.736 |
| rs388693   | 12 | 87675180  | 19  | 183 | 368 | 34  | 0.094 | 0.915 | 0.821 | 0.292 |
| rs2380549  | 2  | 14058476  | 25  | 157 | 253 | 11  | 0.137 | 0.958 | 0.821 | 0.324 |
| rs12635307 | 3  | 66603496  | 40  | 272 | 391 | 21  | 0.128 | 0.949 | 0.821 | 0.298 |
| rs901303   | 2  | 163241954 | 278 | 36  | 35  | 505 | 0.885 | 0.065 | 0.821 | 0.719 |
| rs1557519  | 16 | 14158804  | 31  | 281 | 482 | 42  | 0.099 | 0.920 | 0.820 | 0.258 |
| rs723632   | 1  | 210448147 | 10  | 108 | 143 | 15  | 0.085 | 0.905 | 0.820 | 0.245 |
| rs10032765 | 4  | 63551250  | 155 | 21  | 16  | 246 | 0.881 | 0.061 | 0.820 | 0.697 |
| rs4652291  | 1  | 174760368 | 170 | 10  | 33  | 231 | 0.944 | 0.125 | 0.819 | 0.771 |
| rs2488597  | 9  | 123071627 | 179 | 3   | 43  | 219 | 0.984 | 0.164 | 0.819 | 0.812 |
| rs13107001 | 4  | 176774736 | 104 | 14  | 10  | 150 | 0.881 | 0.063 | 0.819 | 0.664 |
| rs1942920  | 18 | 55790389  | 21  | 159 | 245 | 17  | 0.117 | 0.935 | 0.818 | 0.311 |
| rs10957952 | 8  | 81104552  | 25  | 153 | 253 | 11  | 0.140 | 0.958 | 0.818 | 0.351 |
| rs6710083  | 2  | 192598098 | 155 | 23  | 14  | 250 | 0.871 | 0.053 | 0.818 | 0.668 |
| rs4791367  | 17 | 9665099   | 180 | 20  | 33  | 367 | 0.900 | 0.083 | 0.818 | 0.720 |
| rs603295   | 11 | 78308496  | 106 | 12  | 13  | 147 | 0.898 | 0.081 | 0.817 | 0.588 |
| rs615382   | 12 | 48699178  | 277 | 35  | 21  | 273 | 0.888 | 0.071 | 0.816 | 0.731 |
| rs934649   | 8  | 35837839  | 29  | 147 | 259 | 5   | 0.165 | 0.981 | 0.816 | 0.380 |
| rs4513684  | 5  | 147632278 | 148 | 32  | 2   | 262 | 0.822 | 0.008 | 0.815 | 0.658 |
| rs2958458  | 17 | 20655970  | 11  | 171 | 231 | 33  | 0.060 | 0.875 | 0.815 | 0.237 |
| rs3825663  | 14 | 89499502  | 40  | 272 | 509 | 31  | 0.128 | 0.943 | 0.814 | 0.304 |
| rs1025104  | 2  | 86262322  | 298 | 16  | 72  | 462 | 0.949 | 0.135 | 0.814 | 0.790 |
| rs9977512  | 21 | 24556659  | 25  | 153 | 252 | 12  | 0.140 | 0.955 | 0.814 | 0.344 |
| rs6750983  | 2  | 122995486 | 164 | 18  | 23  | 241 | 0.901 | 0.087 | 0.814 | 0.743 |
| rs12503758 | 4  | 114206646 | 174 | 8   | 37  | 223 | 0.956 | 0.142 | 0.814 | 0.758 |
| rs4378393  | 11 | 21560867  | 23  | 159 | 248 | 16  | 0.126 | 0.939 | 0.813 | 0.326 |
| rs4267542  | 2  | 69142701  | 157 | 25  | 13  | 249 | 0.863 | 0.050 | 0.813 | 0.665 |

|            |    |           |     |     |     |     |       |       |       |       |
|------------|----|-----------|-----|-----|-----|-----|-------|-------|-------|-------|
| rs6455767  | 6  | 162118746 | 22  | 158 | 245 | 17  | 0.122 | 0.935 | 0.813 | 0.294 |
| rs679882   | 15 | 38546639  | 248 | 50  | 8   | 404 | 0.832 | 0.019 | 0.813 | 0.655 |
| rs819980   | 1  | 1510967   | 104 | 14  | 11  | 149 | 0.881 | 0.069 | 0.813 | 0.734 |
| rs12807847 | 11 | 26699252  | 14  | 104 | 149 | 11  | 0.119 | 0.931 | 0.813 | 0.336 |
| rs5926178  | 23 | 22735042  | 9   | 171 | 226 | 36  | 0.050 | 0.863 | 0.813 | 0.149 |

---
